# Supplementary material for: Reservoir computing determined by nonlinear weight dynamics in Gd-doped CeO2/CeO2 bi-layered oxide memristors
Source: Royal Society of Chemistry journal article supplement (doi:10.1039/d4tc05041j), 2025-01-01
Supplement: d4tc05041j1.pdf [file d4tc05041j1.pdf]

## Supplementary Information

### **Reservoir Computing Determined by Nonlinear Weight Dynamics in Gd-doped CeO<sub>2</sub>/CeO<sub>2</sub> Bi-layered Oxide Memristors**

*Sola Moon*<sup>a</sup>, *Cheolhong Park*<sup>b</sup>, *Yunyoung Jung*<sup>c</sup>, *Kyeong-Sik Min*<sup>d</sup>, *Hyunhyub Ko*<sup>b\*</sup>  
*and Tae-Sik Yoon*<sup>a\*</sup>

<sup>a</sup> Graduate School of Semiconductor Materials and Devices Engineering, Ulsan National Institute of Science and Technology, Ulsan 44919, Republic of Korea.

<sup>b</sup> School of Energy and Chemical Engineering, Ulsan National Institute of Science and Technology, Ulsan 44919, Republic of Korea.

<sup>c</sup> Security Technology Laboratory, Pentasecurity Inc, Seoul 07241, Republic of Korea.

<sup>d</sup> School of Electrical Engineering, Kookmin University, Seoul 02707, Republic of Korea.

#### **Corresponding author**

\*E-mail: [hyunhko@unist.ac.kr](mailto:hyunhko@unist.ac.kr) (H. Ko)

\*E-mail: [tsyoon@unist.ac.kr](mailto:tsyoon@unist.ac.kr) (T.-S. Yoon)

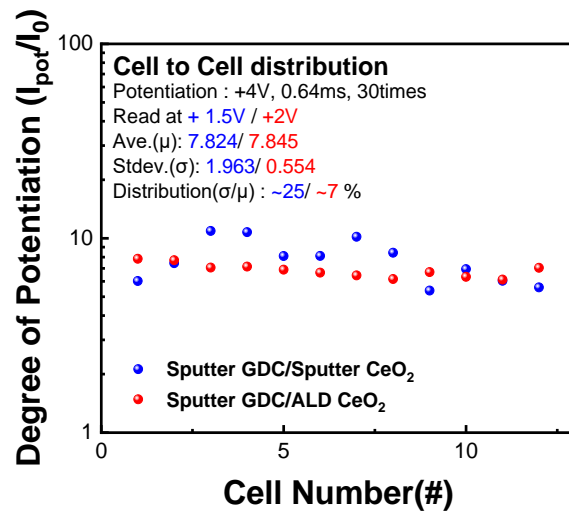

**Fig. S1.** Cell-to-cell distribution the degree of potentiation results of the device using sputter-deposited bilayers and the device using sputter GDC/ALD CeO<sub>2</sub>.

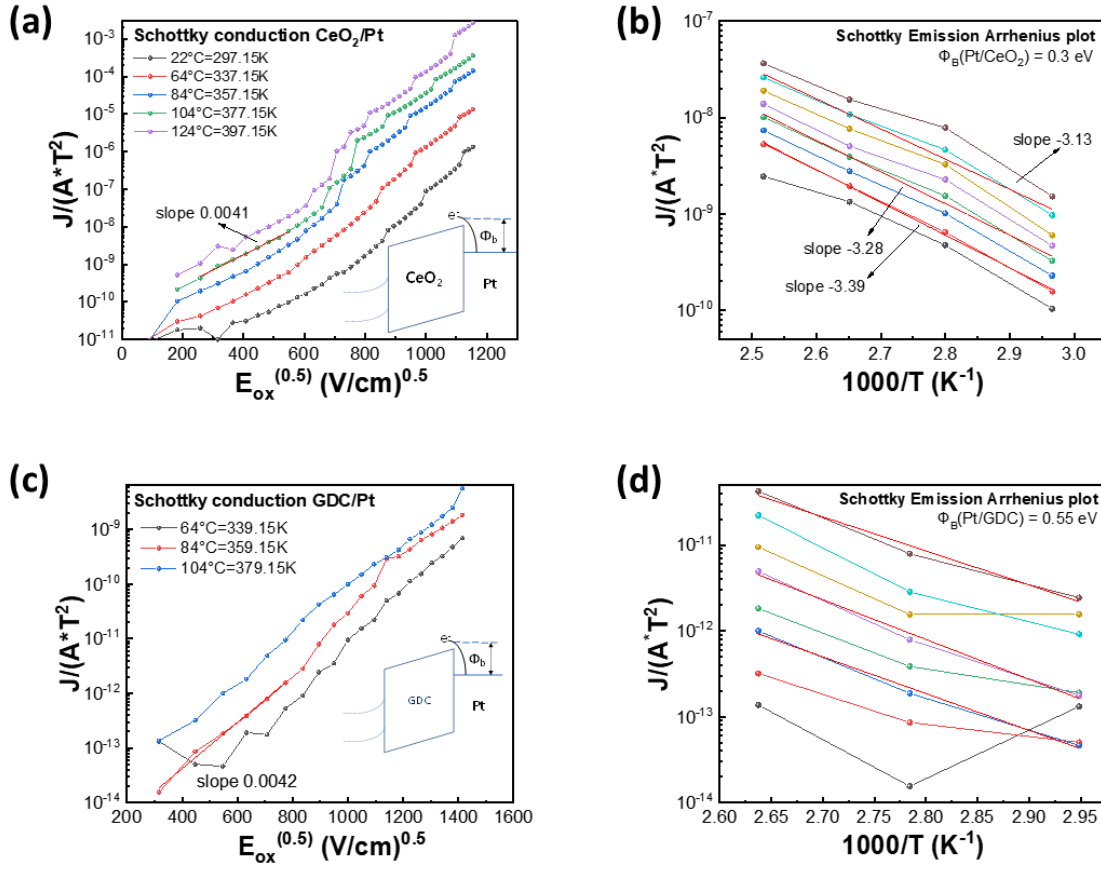

**Fig. S2. Calculation of Schottky barrier height.**  $I$ - $V$  curves in the form of Schottky conduction with the relation of (a)  $\log(J/A^*T^2)$  with respect to  $E_{ox}^{0.5}$  at the temperatures of 297.15, 337.15, 357.15, 377.15 and 397.15 K with the band diagram of Pt/CeO<sub>2</sub> interface (inset) and (b)  $\log(J/A^*T^2)$  with respect to  $1/T$ .  $I$ - $V$  curves in the form of Schottky conduction with the relation of (c)  $\log(J/A^*T^2)$  with respect to  $E_{ox}^{0.5}$  at the temperatures of 339.15, 359.15, and 379.15 K with the band diagram of Pt/GDC interface (inset) and (d)  $\log(J/A^*T^2)$  with respect to  $1/T$ .

For the Schottky conduction mechanism equation,

$$J = A^*T^2 \exp \left[ -\frac{q\phi_B}{k_bT} + \frac{1}{k_bT} \left( \frac{q^3 E_{ox}}{4\pi k_d \epsilon_0} \right)^{1/2} \right] \quad (S1)$$

where  $J$  is the current density,  $A^*$  is effective Richardson constant,  $q\phi_B$  is the Schottky barrier height,  $T$  is the absolute temperature,  $q$  is the elementary charge,  $\epsilon_0$  is the absolute dielectric permittivity of vacuum,  $E_{ox}$  is the electric field across the CeO<sub>2</sub> and GDC layer,  $k_b$  is the

Boltzmann's constant,  $k_d$  is dynamic dielectric constant of CeO<sub>2</sub> and GDC layer as extracted from the slope of the graphs in Fig. S2a and Fig. S2c. To calculate Schottky barrier height  $q\phi_B$ , the curves were replotted in the relation  $\log(J/A * T^2)$  with respect to  $1/T$ . From the slopes of these curves, the Schottky barrier heights of CeO<sub>2</sub> and GDC thin films were determined to be 0.3 eV and 0.55 eV.

| Pulse \ Interval | +5Vx10 | +5Vx20 | +7Vx20 |
|------------------|--------|--------|--------|
| 5s               | 4      | 3      |        |
| 10s              |        | 1      | 2      |

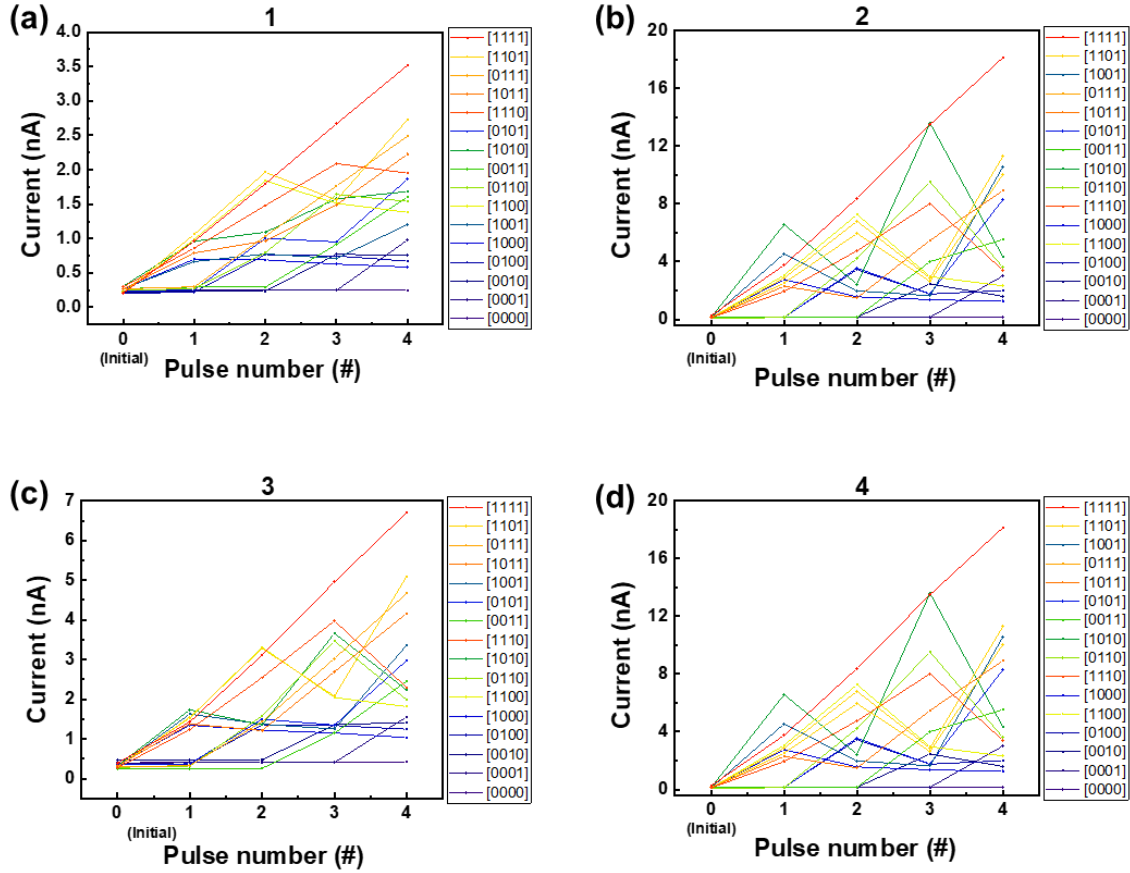

**Fig. S3. Experimental results of binary 4-bit input pulse data discrimination processing at four different pulse conditions.** Experimental results of binary 4-bit input data discrimination processing by applying a binary 4-bit pulse train with a total of 16 states ([0000] to [1111]) for each the condition shown in the table. The read pulse amplitude and width are +2 V and 0.64 ms, respectively. The pulse condition of (a) +5 Vx20 read at +2V, interval 10 s (condition 1), (b) +7 Vx20 read at +2V, interval 10 s (condition 2), (c) +5 Vx20 read at +2V, interval 5 s (condition 3), and (d) +5 Vx10 read at +2V, interval 5 s (condition 4).

| Pulse<br>Interval | +5Vx10 | +5Vx20 | +7Vx20 |
|-------------------|--------|--------|--------|
| 5s                | 4      | 3      |        |
| 10s               |        | 1      | 2      |

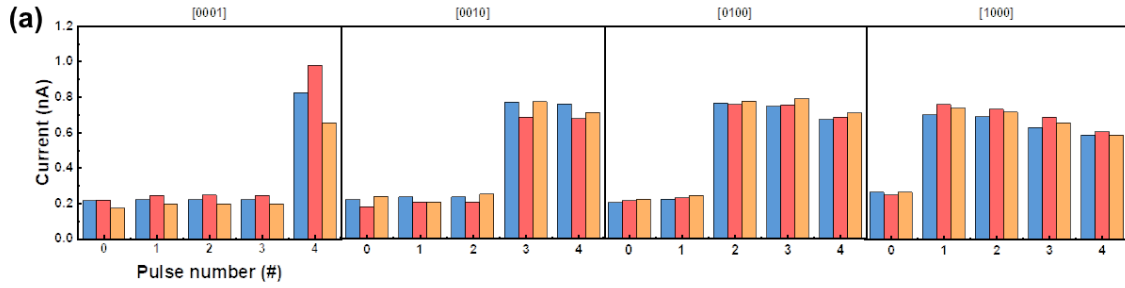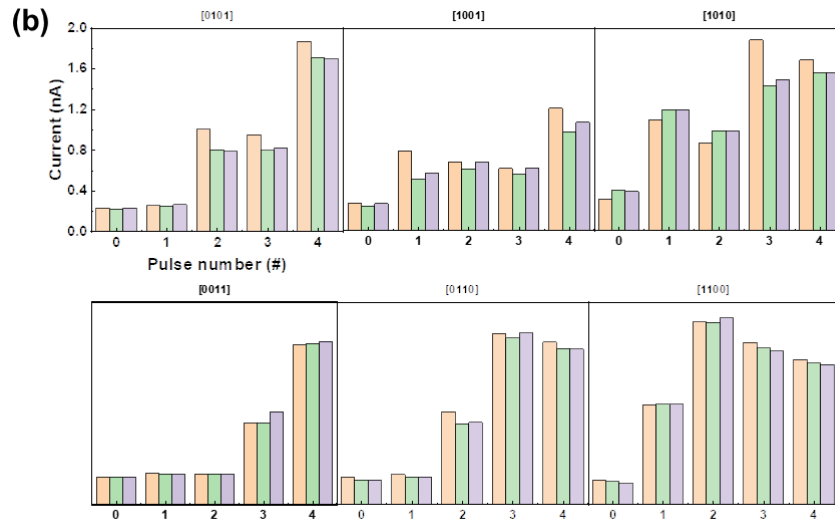

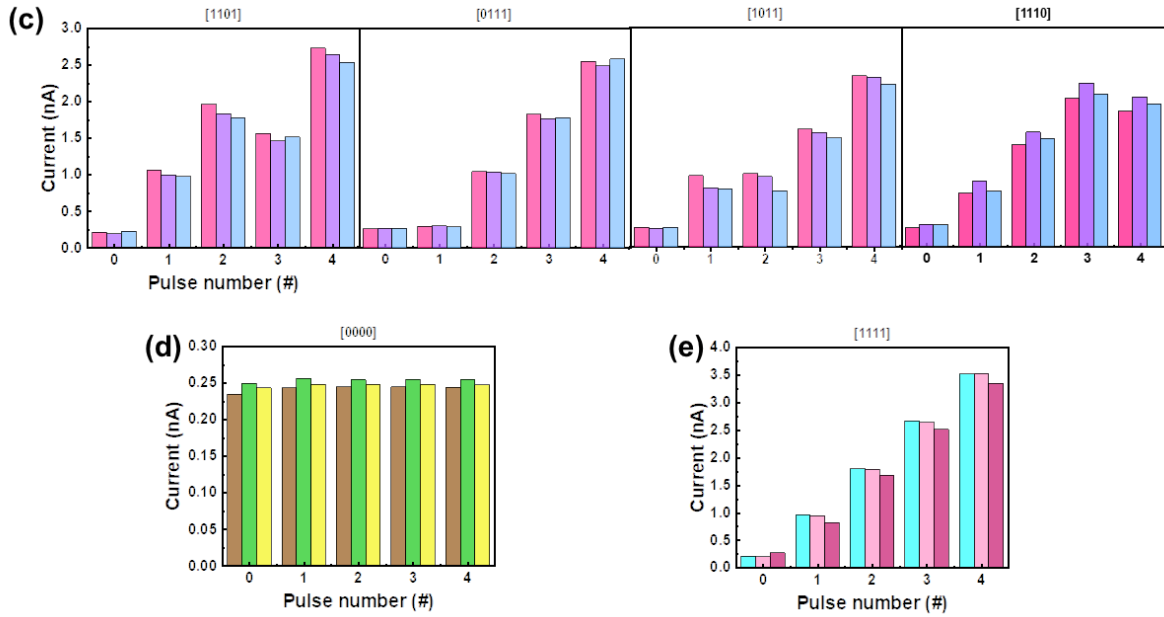

**Fig. S4.** In the case of pulse condition 1, response of GDC/CeO<sub>2</sub> memristors by repeatedly applying a pulse train to a binary 4-bit input for a total of 3 times with read pulse (+2 V, 0.64 ms) (a) when the pulse bit corresponding to “1” is one ([1000], [0100], [0010], [0001]), (b) when the pulse bit corresponding to “1” is two ([0101], [1010], [0011], [0110], [1100], [1001]), (c) when the pulse bit corresponding to “1” is three ([1101], [0111], [1011], [1110]), (d) when the pulse bit corresponding to “1” is zero ([0000]), and (e) when the pulse bit corresponding to “1” is four ([1111]).

| Pulse \ Interval | +5Vx10 | +5Vx20 | +7Vx20   |
|------------------|--------|--------|----------|
| 5s               | 4      | 3      |          |
| 10s              |        | 1      | <b>2</b> |

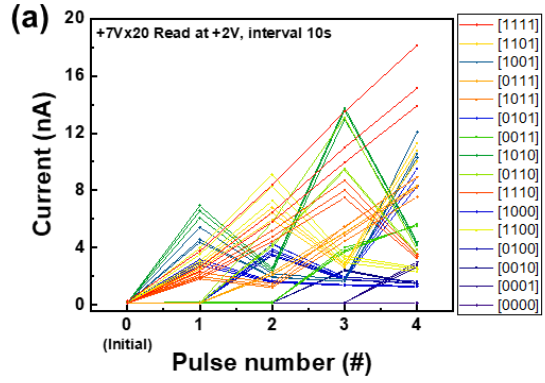

(b)

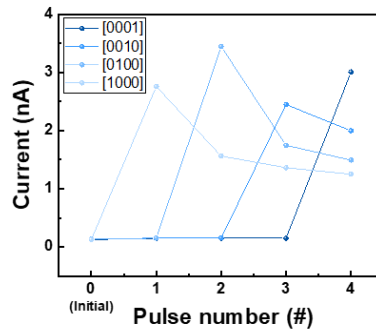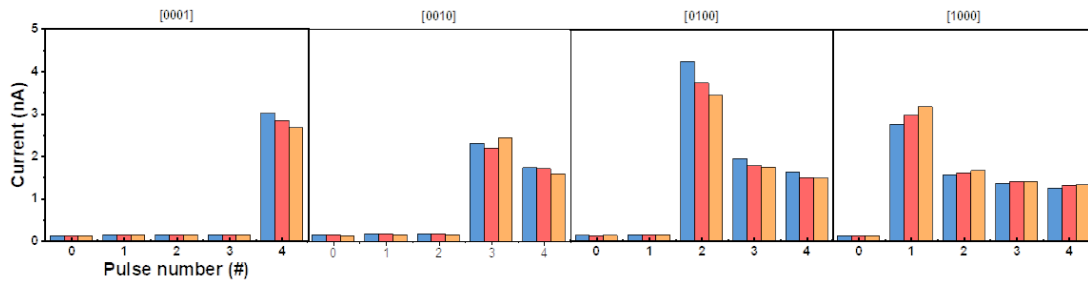

(c)

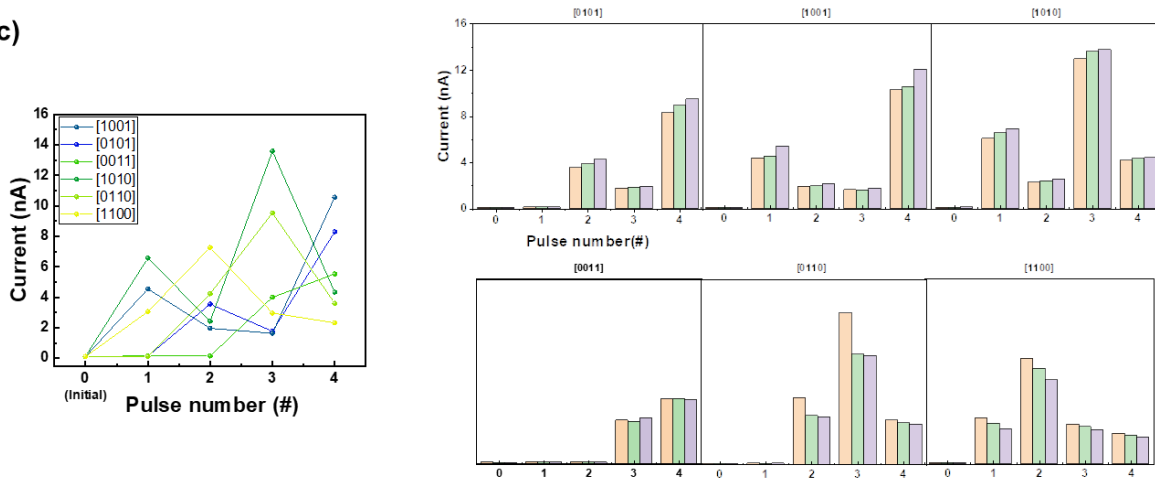



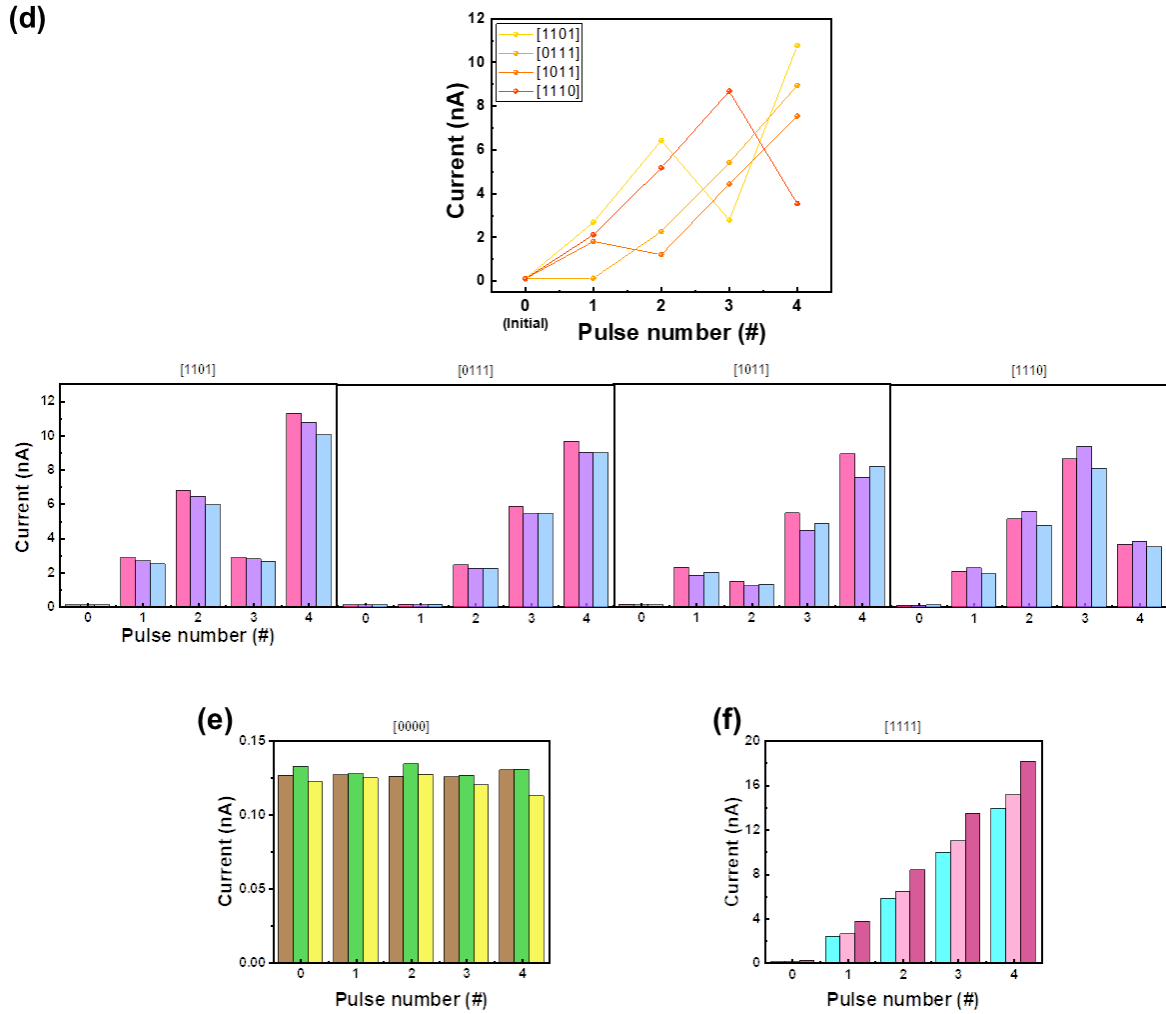

**Fig. S5.** In the case of pulse condition 2, response of GDC/CeO<sub>2</sub> memristors by repeatedly applying a pulse train to a binary 4-bit input for a total of 3 times with read pulse (+2 V, 0.64 ms) **(a)** when the pulse bit corresponding to “1” is one ([1000], [0100], [0010], [0001]), **(b)** when the pulse bit corresponding to “1” is two ([0101], [1010], [0011], [0110], [1100], [1001]), **(c)** when the pulse bit corresponding to “1” is three ([1101], [0111], [1011], [1110]), **(d)** when the pulse bit corresponding to “1” is zero ([0000]), and **(e)** when the pulse bit corresponding to “1” is four ([1111]).

| Pulse / Interval | +5Vx10 | +5Vx20 | +7Vx20 |
|------------------|--------|--------|--------|
| 5s               | 4      | 3      |        |
| 10s              |        | 1      | 2      |

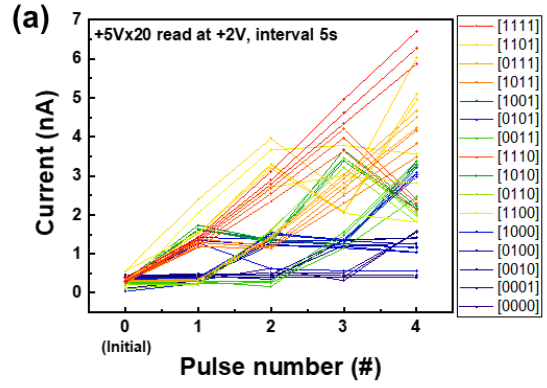

(b)

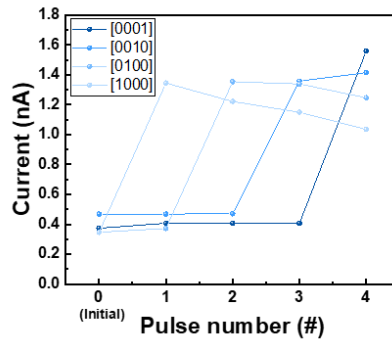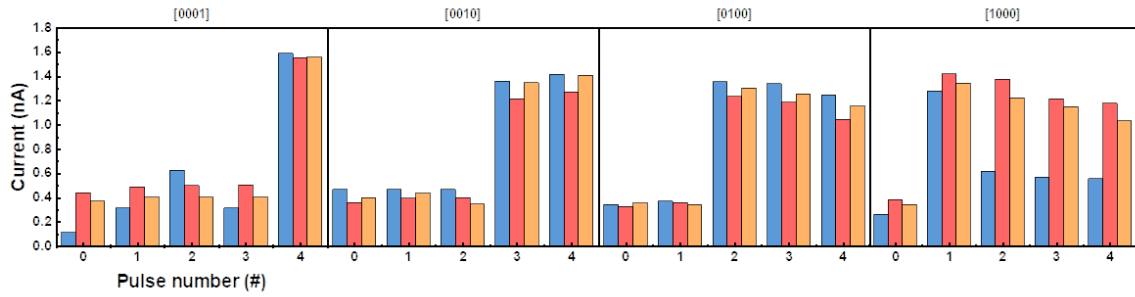

(c)

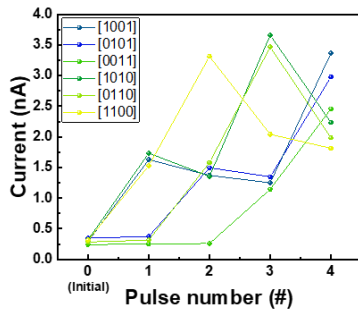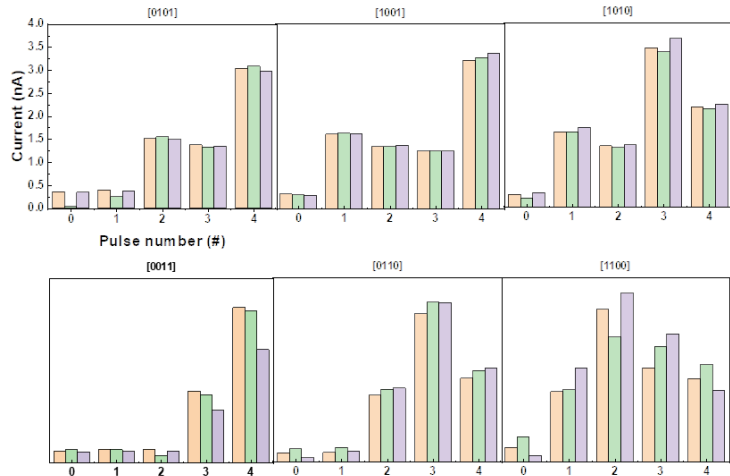

(d)

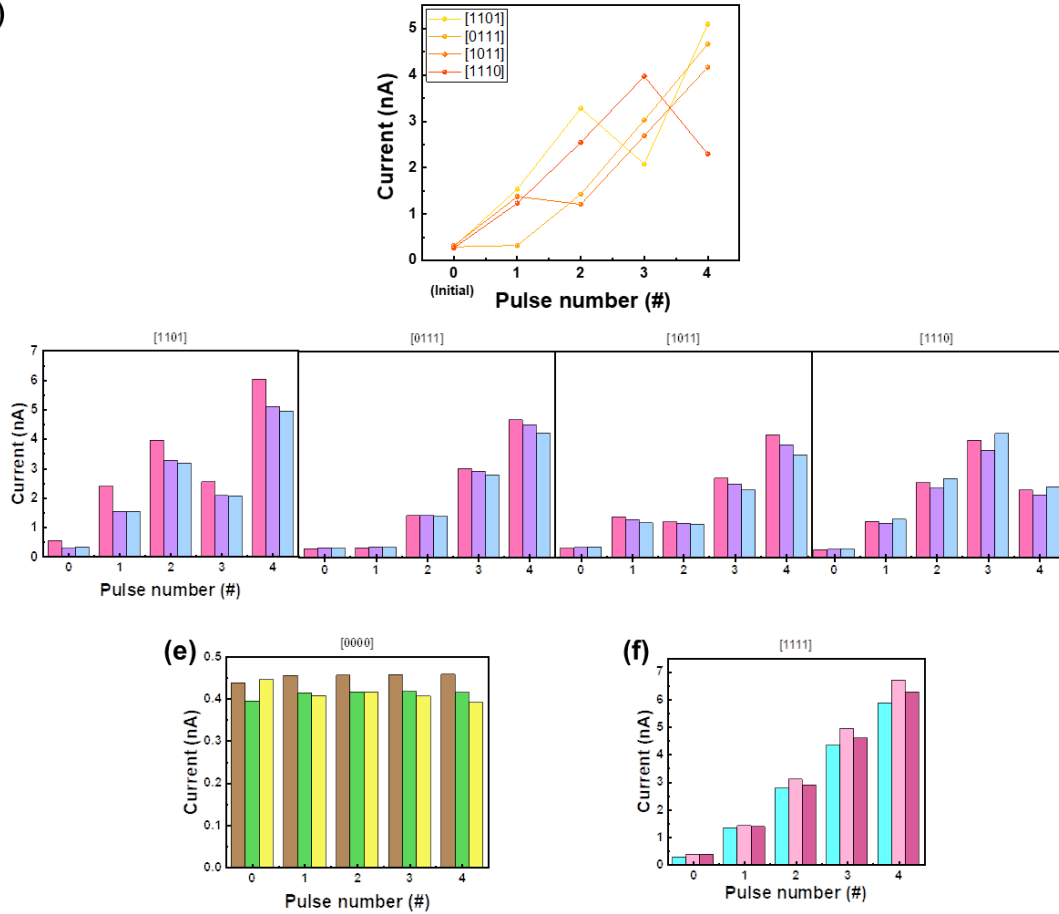

**Fig. S6.** In the case of pulse condition 3, response of GDC/CeO<sub>2</sub> memristors by repeatedly applying a pulse train to a binary 4-bit input for a total of 3 times with read pulse (+2 V, 0.64 ms) **(a)** when the pulse bit corresponding to “1” is one ([1000], [0100], [0010], [0001]), **(b)** when the pulse bit corresponding to “1” is two ([0101], [1010], [0011], [0110], [1100], [1001]), **(c)** when the pulse bit corresponding to “1” is three ([1101], [0111], [1011], [1110]), **(d)** when the pulse bit corresponding to “1” is zero ([0000]), and **(E)** when the pulse bit corresponding to “1” is four ([1111]).

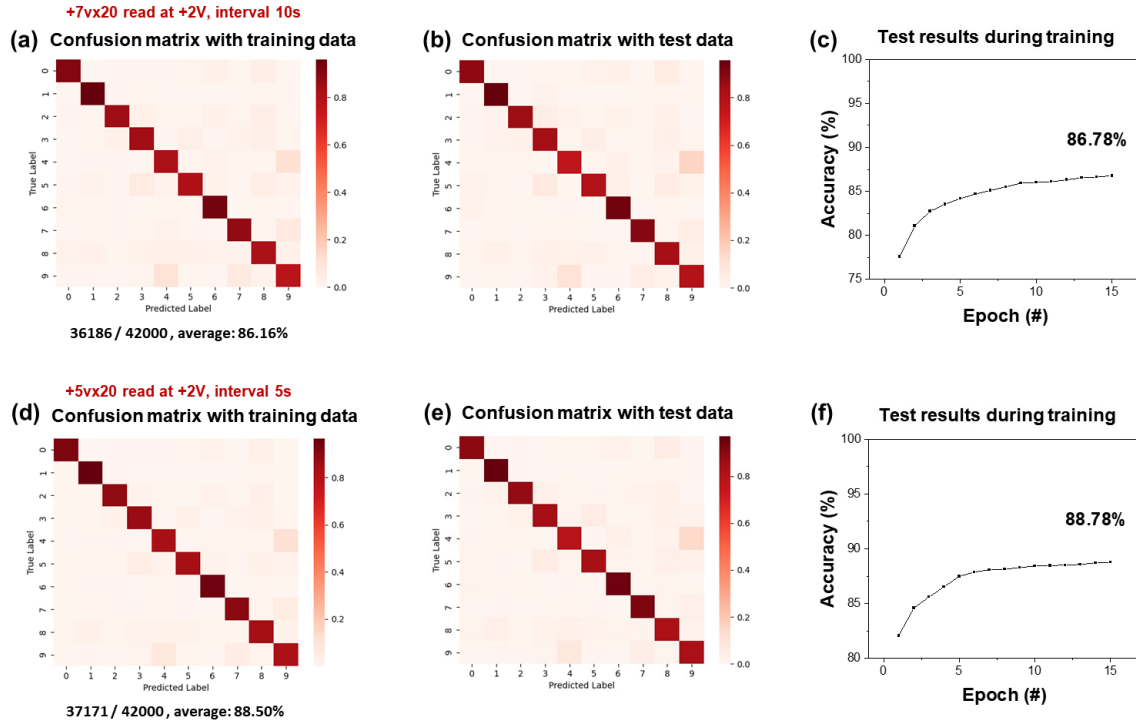

**Fig. S7. Recognition of handwritten digit images using a memristor-based RC system.** (a) Confusion matrix with training data, (b) confusion matrix with test data, and (c) the simulation results of accuracy at the 15th epoch of 4-bit classification for RC system in the pulse conditions  $+7\text{ V}\times 20$  read at  $+2\text{ V}$ . (d) Confusion matrix with training data, (e) confusion matrix with test data, and (f) the simulation results of accuracy at the 15th epoch of 4-bit classification for RC system in the pulse conditions  $+5\text{ V}\times 20$  read at  $+2\text{ V}$ .

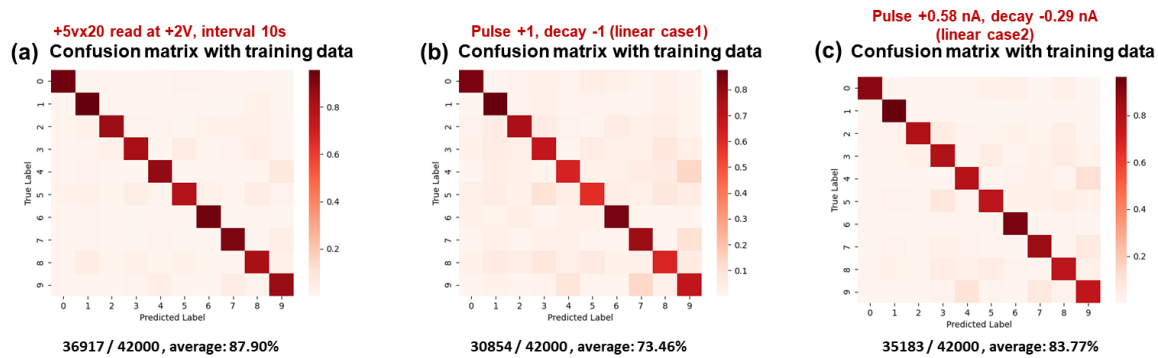

**Fig. S8. Recognition of handwritten digit images using a memristor-based RC system.** Confusion matrix with training data in conditions (a)  $+5\text{ V}\times 20$  read at  $+2\text{ V}$ , interval 10 s (condition 1), (b) linear case 1, and (c) linear case 2.
